# Supplementary material for: Genome-Wide Genomic and Functional Association Study for Workability and Calving Traits in Holstein Cattle
Source: Preprints.org preprint supplement (doi:10.20944/preprints202202.0178.v1), 2022-02-14
Supplement: Supplementary file 3 [file supplementary]

## Sheet: Table 1 Calving Trait
SNP	rs	Position	Effect	P-value	Gene	QTLdb and mouse phenotypes (Related traits)
DCE
HAPMAP57248-RS29018609	rs29018609	5:54609839	5.55097	6.00·10-4	ENSBTAG00000002227	mouse ortolog gene: lethality throughout fetal growth and developments, preweaning lethality
HAPMAP34864-BES11_CONTIG325_836	rs43710041	5:57233497	5.08734	8.39·10-3	ENSBTAG00000010444	mouse ortolog gene: lethality throughout fetal growth and developments, preweaning lethality
HAPMAP60306-RS29023088	rs29023088	5:60323282	4.92863	1.91·10-2	ENSBTAG00000016415	Birth index, Calf size, Stillbirth, mouse ortolog gene: lethality throughout fetal growth and developments, preweaning lethality
BTA-20508-NO-RS	rs41580131	5:63472283	5.55836	6.29·10-4	-	mouse ortolog gene: lethality throughout fetal growth and developments, preweaning lethality
ARS-BFGL-NGS-3933	rs110175479	5:105301690	5.81461	1.40·10-4	-	mouse ortolog gene: preweaning lethality, embryonic lethality
HAPMAP47397-BTA-74925	rs41655452	5:105350319	6.02233	3.97·10-5	ENSBTAG00000047191	mouse ortolog gene: preweaning lethality, embryonic lethality
HAPMAP60480-SS46526970	rs41257416	5:105474132	8.85554	4.16·10-19	ENSBTAG00000005465	mouse ortolog gene: preweaning lethality, embryonic lethality
ARS-BFGL-NGS-118977	rs109969273	5:105666187	6.26748	8.47·10-6	ENSBTAG00000006800	mouse ortolog gene: preweaning lethality, embryonic lethality
HAPMAP57466-RS29018274	rs29018274	5:106865001	5.10695	7.57·10-3	ENSBTAG00000015879
ARS-BFGL-NGS-42061	rs110723137	7:89480893	4.92061	1.99·10-2	-
HAPMAP46473-BTA-21133	rs41625106	7:89939539	5.74089	2.18·10-4	ENSBTAG00000014373	Birth index, Body weight, Calf size
ARS-BFGL-NGS-20761	rs110498985	17:67203528	5.02145	1.19·10-2	ENSBTAG00000010464	Calving ease, Stillbirth
HAPMAP47002-BTA-41821	rs41634351	17:68274420	5.98231	5.08·10-5	ENSBTAG00000022036	Calf size, Calving ease, Stillbirth
ARS-BFGL-NGS-78487	rs41850724	17:68308036	6.06189	3.10·10-5	ENSBTAG00000022036	mouse ortolog gene: embryonic and preweaning lethality
ARS-BFGL-NGS-1166	rs109981365	17:68618815	5.16	5.71·10-3	ENSBTAG00000001189	mouse ortolog gene: embryonic and preweaning lethality
ARS-BFGL-NGS-69511	rs110370705	17:68907367	6.46374	2.36·10-6	ENSBTAG00000002452	mouse ortolog gene: embryonic and preweaning lethality
ARS-BFGL-BAC-35623	rs109004616	17:69201487	5.12719	6.80·10-3	ENSBTAG00000013877	Calving ease, Stillbirth, mouse ortolog gene: embryonic and preweaning lethality
UA-IFASA-5513	rs41634418	17:70345109	6.43096	2.93·10-6	ENSBTAG00000009006
ARS-BFGL-NGS-93837	rs110389036	18:55355731	6.65862	6.38·10-7	ENSBTAG00000011617	Birth index, Calf size, Bode depth, Calving ability, Calving ease, Stillbirth, Strength, Stature, Rump width, Body weigth
ARS-BFGL-NGS-25104	rs109341458	18:55910466	5.09706	7.97·10-3	ENSBTAG00000000330	Body weigth, Calving ability, Calving ease, Stature, Stillbirth, Young stock survival
ARS-BFGL-NGS-104774	rs108984194	18:56106285	7.92554	5.13·10-11	ENSBTAG00000012205
HAPMAP39335-BTA-43845	rs41582494	18:56187306	4.92229	1.98·10-2	ENSBTAG00000008518
ARS-BFGL-NGS-38866	rs110780496	18:56506232	6.84048	1.82·10-7	ENSBTAG00000006780	Body weigth, Calving ease, Stillbirth
ARS-BFGL-NGS-116907		18:56560930	9.22002	1.48·10-20	-
ARS-BFGL-NGS-98028	rs41636749	18:56716572	7.81582	1.28·10-10	ENSBTAG00000013105
ARS-BFGL-NGS-25117	rs42843551	18:56780040	12.1889	1.78·10-34	ENSBTAG00000013107
BTA-97501-NO-RS	rs41665732	18:57106651	8.43431	1.66·10-17	ENSBTAG00000004608
ARS-BFGL-NGS-109285	rs109478645	18:57137302	12.0108	1.55·10-18	ENSBTAG00000037537	Birth index, Calf size, Calving ease, Stillbirth
ARS-BFGL-BAC-2333	rs109882115	18:57741397	10.6641	7.49·10-27	ENSBTAG00000039491	Calf size
ARS-BFGL-NGS-112752	rs109173807	18:58014978	7.46794	1.88·10-9	-
HAPMAP45189-BTA-43948	rs41636786	18:58065996	6.73487	3.79·10-7	-
HAPMAP40906-BTA-121147	rs41664920	18:58213698	8.97723	1.38·10-19	ENSBTAG00000049460	Calving ease
HAPMAP40537-BTA-43945	rs41582522	18:58328337	7.13309	2.26·10-8	ENSBTAG00000053131
ARS-BFGL-NGS-15484	rs43182024	18:58490610	6.59847	9.59·10-7	ENSBTAG00000011052
ARS-BFGL-NGS-116069	rs42550256	18:59502602	8.88547	3.18·10-19	-	Birth index
ARS-BFGL-NGS-118325	rs109530681	18:59922105	7.60646	6.51·10-10	ENSBTAG00000054088
ARS-BFGL-NGS-39594	rs110889414	18:59953467	7.30479	6.41·10-9	ENSBTAG00000054088
HAPMAP39566-BTA-43960	rs41636798	18:60057741	6.77272	2.92·10-7	-
ARS-BFGL-NGS-17877	rs109998463	18:60115619	8.71052	1.51·10-18	ENSBTAG00000047301
BTB-01438985	rs42563166	18:60145123	8.5982	4.04·10-18	ENSBTAG00000053759
ARS-BFGL-NGS-107318	rs110912084	18:60746222	6.6683	5.97·10-7	ENSBTAG00000016513
ARS-BFGL-NGS-21704	rs110638693	18:60876129	4.98696	1.42·10-2	-
ARS-BFGL-NGS-49873	rs109118771	18:60980891	6.52332	1.58·10-6	-
BTA-03959-NO-RS	rs29011715	18:61773798	5.30067	2.67·10-3	ENSBTAG00000004725
HAPMAP47226-BTA-25234	rs41574664	18:63388603	5.21552	4.24·10-3	-
ARS-BFGL-NGS-17826	rs41902064	18:64118087	9.3802	3.29·10-21	ENSBTAG00000050637	Body weight (yearling)
ARS-BFGL-NGS-38620	rs41902634	18:64214636	5.42412	1.35·10-3	-	brith index, Calf size, Calving ease, Calving index, Stillbirth
ARS-BFGL-NGS-36598	rs110402487	18:64444876	5.81394	1.41·10-4	-
ARS-BFGL-NGS-32605	rs110877668	18:64890562	5.19665	4.69·10-3	ENSBTAG00000048765
ARS-BFGL-NGS-117714	rs110506462	18:65581470	6.41078	3.34·10-6	ENSBTAG00000049556
BTB-00745347	rs41905407	19:28149906	4.95757	1.65·10-2	ENSBTAG00000021151	mouse ortologes: embryonic growth retardation, preweaning lethality
ARS-BFGL-NGS-23160	rs109429521	21:8044281	5.34749	2.06·10-3	ENSBTAG00000021527
ARS-BFGL-NGS-24429	rs109142821	21:8068219	5.33004	2.27·10-3	ENSBTAG00000021527
HAPMAP39413-BTA-51926	rs41640696	21:8096480	5.36027	1.92·10-3	ENSBTAG00000021531
ARS-BFGL-NGS-67514	rs109496361	21:8125084	5.36881	1.83·10-3	-
ARS-BFGL-NGS-7032	rs110312059	25:35935670	5.26372	3.26·10-3	ENSBTAG00000008295
ARS-BFGL-NGS-110393	rs110913597	29:48041285	5.15488	5.86·10-3	ENSBTAG00000003171
ARS-BFGL-NGS-109317	rs109914995	29:49234278	5.51571	8.03·10-4	-
ARS-BFGL-NGS-40378	rs42196507	29:49657267	6.70462	4.66·10-7	ENSBTAG00000040103
MCE
BTB-01654826	rs42766480	6:87156735	5.13121	6.65·10-3	-	Calving ease, Calving ease (maternal), Stillbirth, PTA type, Rump width
ARS-BFGL-NGS-34464	rs109399965	6:110482099	7.26295	8.75·10-9	ENSBTAG00000010343	Calving ease, Calving index
ARS-BFGL-NGS-117080	rs42732266	6:110933133	5.39154	1.61·10-3	-
BTB-00404975	rs43610539	9:88598336	5.84916	1.14·10-4	ENSBTAG00000004099
BTB-00404802	rs43608567	9:88684552	7.0473	4.21·10-8	-
ARS-BFGL-NGS-25117	rs42843551	18:56780040	5.242	3.67·10-3	ENSBTAG00000013107	Calving ease, Stillbirth
ARS-BFGL-NGS-109285	rs109478645	18:57137302	5.06213	9.58·10-3	ENSBTAG00000037537	Birth indes, Calf size, Body depth, Calving ability, Calving ease (maternal), Stillbirth, Strength, Stature, Rumn width, Calving ease, Body weigth
ARS-BFGL-NGS-118325	rs109530681	18:59922105	5.0228	1.18·10-2	ENSBTAG00000054418
BTA-50131-NO-RS	rs41601571	20:26929602	6.17156	1.56·10-5	-	Calf size, Calving index, Calving ease
ARS-BFGL-NGS-103131	rs110689641	X:863652	5.93495	6.79·10-5	-	Body depth, Rump width, Stature, Strength
ARS-BFGL-NGS-115919	rs109542675	X:40049661	6.14495	1.84·10-5	ENSBTAG00000001911
HAPMAP40940-BTA-30188	rs41578433	X:55486780	4.88926	2.34·10-2	ENSBTAG00000005294
ARS-BFGL-NGS-31287	rs110345281	X:75096594	5.71453	2.54·10-4	-
ARS-BFGL-NGS-105056	rs42766480	X:87156735	6.21385	1.19·10-5	-	Calving ease, Calving ease(maternal), PTA type, Rump width, Stillbirth (maternal)
HAPMAP49448-BTA-111996	rs41567624	X:87848657	5.89917	8.44·10-5	-	Body depth, Dairy form, PTA type, Rump width, Calving ease, Stillbirth
HAPMAP38212-BTA-30446	rs41578495	X:100040302	5.176	5.24·10-03	-
ARS-BFGL-NGS-102366	rs109200249	X:127125130	5.60832	4.72·10-04	-
DSB
HAPMAP60480-SS46526970	rs41257416	5:105474132	4.88929	2.34·10-2	ENSBTAG00000005465
ARS-BFGL-NGS-25104	rs109341458	18:55910466	4.98921	1.40·10-2	ENSBTAG00000000330
ARS-BFGL-NGS-104774	rs108984194	18:56106285	5.74469	2.13·10-4	ENSBTAG00000012205
ARS-BFGL-NGS-38866	rs110780496	18:56506232	4.99305	1.37·10-2	ENSBTAG00000006780
ARS-BFGL-NGS-116907		18:56560930	6.62094	8.24·10-7	-
ARS-BFGL-NGS-98028	rs41636749	18:56716572	6.0519	3.30·10-5	ENSBTAG00000013105
ARS-BFGL-NGS-25117	rs42843551	18:56780040	9.30526	6.68·10-21	ENSBTAG00000013107
BTA-97501-NO-RS	rs41665732	18:57106651	6.6297	7.77·10-7	ENSBTAG00000004608
ARS-BFGL-NGS-109285	rs109478645	18:57137302	8.83958	4.80·10-19	ENSBTAG00000037537	Birth index, Calf size, Body depth, Calving abilities, Calving ease (maternal), Stillbirth, Strength, Rump width, Calving ease, Body weight
ARS-BFGL-BAC-2333	rs109882115	18:57741397	8.74681	1.09·10-18	ENSBTAG00000039491	Body weigth (birth), Body depth, Calving ease, Stature, Stillbirth, Young stock survival
HAPMAP45189-BTA-43948	rs41636786	18:58065996	4.95017	1.71·10-02
HAPMAP40906-BTA-121147	rs41664920	18:58213698	7.47115	1.83·10-9	ENSBTAG00000049460	Body weigth, Calving ease, Stillbirth
HAPMAP40537-BTA-43945	rs41582522	18:58328337	6.22909	1.08·10-5	ENSBTAG00000053131
ARS-BFGL-NGS-15484	rs43182024	18:58490610	5.67709	3.17·10-4	ENSBTAG00000011052
ARS-BFGL-NGS-118325	rs109530681	18:59922105	7.18443	1.55·10-8	ENSBTAG00000054088
ARS-BFGL-NGS-39594	rs110889414	18:59953467	6.90649	1.14·10-7	ENSBTAG00000054088	Calf size, Calving ease, Stillbirth
BTB-01438985	rs42563166	18:60145123	7.35253	4.49·10-9	ENSBTAG00000053759
ARS-BFGL-NGS-17877	rs109998463	18:60115619	6.16628	1.61·10-5	ENSBTAG00000038674
ARS-BFGL-NGS-107318	rs110912084	18:60746222	5.03784	1.09·10-2	ENSBTAG00000016513	Calving ease
ARS-BFGL-NGS-103214	rs110508656	18:62868074	4.92918	1.91·10-2	ENSBTAG00000003470	Calving ease, Stillbirth , mouse orthologues: embryonic lethality before implantation, complete penetrance; embryonic growth arrest
ARS-BFGL-NGS-16284	rs110883586	23:24922231	4.94282	1.78·10-2	ENSBTAG00000009112
HAPMAP59851-RS29025765	rs29025765	X:16054398	5.80678	1.47·10-4	-
ARS-BFGL-NGS-105056	rs109498447	X:30435974	5.95895	5.86·10-5	-
ARS-BFGL-NGS-13837	rs110344484	X:208267432	5.09767	7.95·10-3	-
HAPMAP40901-BTA-119795	rs41619398	X:108335715	5.25654	3.39·10-3	-	Calving ease, Dairy form, Rump angle, Rumph width, Stillbirth, Stillbirth (maternal)
MSB
ARS-BFGL-NGS-1316	rs110196342	3:13927203	5.43359	1.28·10-3	ENSBTAG00000012361
BTA-56213-NO-RS	rs41642775	9:87548281	6.99955	5.93·10-8	-
BTB-00405541	rs43615598	9:88210465	5.03878	1.08·10-2	-
BTB-00405487	rs43615544	9:88254314	5.99472	4.71·10-5	-
ARS-BFGL-NGS-66371	rs110401672	9:88561108	6.3039	6.70·10-6	ENSBTAG00000004099
BTB-00404975	rs43610539	9:88598336	7.90596	6.15·10-11	ENSBTAG00000004099
BTB-00404802	rs43608567	9:88684552	8.28407	5.13·10-12	-
BTB-01895465	rs43003144	9:90252969	6.83359	1.91·10-7	-
ARS-BFGL-NGS-118325	rs109530681	18:59922105	5.4853	9.54·10-4	ENSBTAG00000054418
ARS-BFGL-NGS-39594	rs110889414	18:59953467	5.42601	1.33·10-3	ENSBTAG00000054088	Calf size, Calving ease, Stillbirth
BTB-01438985	rs42563166	18:60145123	5.02541	1.16·10-2	ENSBTAG00000053759	Calving ease, Calving index
HAPMAP39879-BTA-101999	rs41572366	25:21400170	4.98188	1.46·10-2	ENSBTAG00000012541	mouse orthologue: preweaning lethality
ARS-BFGL-NGS-115943	rs110715991	23:28443982	5.24867	3.54·10-3	-
ARS-BFGL-NGS-103131	rs110689641	X:863652	5.31797	2.42·10-3	-	Body depth, Rump width, Stature, Strength
ARS-BFGL-NGS-22277	rs110485888	X:25456165	5.16357	5.60·10-3	-
ARS-BFGL-NGS-105056	rs109498447	X:30435974	5.32562	2.32·10-3	-
BTA-30585-NO-RS	rs41626794	X:114737186	4.93038	1.90·10-2	-

## Sheet: Table 2 Workability Trait
SNP	rs	Position	Effect	P-value	Gene	QTLdb and mouse phenotypes (Related traits)
TEM
ARS-BFGL-NGS-47196	rs110719178	X:813448	5.00926	1.26·10-2	-
ARS-BFGL-NGS-103131	rs110689641	X:863652	4.99577	1.35·10-2	-	Body depth, Rump width, Stature, Strength
HAPMAP43378-BTA-85949	rs41662793	X:62929712	5.98393	5.03·10-5	-
HAPMAP39108-BTA-22340	rs41631246	X:74200611	5.40973	1.46·10-3	ENSBTAG00000026025
HAPMAP50606-BTA-16951	rs41621075	X:74239322	5.36598	1.86·10-3	ENSBTAG00000000895
BTA-119182-NO-RS	rs41623769	X:74434775	6.11705	2.20·10-5	ENSBTAG00000010018	mouse orthologue: lethargy, hypoactivity
BTA-27090-NO-RS	rs41628806	X:131311943	5.2903	2.82·10-3	-
MSP
ARS-BFGL-NGS-117505	rs43130474	1:142988689	4.8984	2.23·10-2	ENSBTAG00000021899
HAPMAP49439-BTA-109526	rs41620153	4:70201858	6.54307	1.39·10-6	-
BTA-28787-NO-RS	rs41599885	5:37711059	5.04722	1.04·10-2	-
HAPMAP47397-BTA-74925	rs41655452	5:105350319	5.41477	1.42·10-3	ENSBTAG00000047191
HAPMAP60480-SS46526970	rs41257416	5:105474132	5.42687	1.33·10-3	ENSBTAG00000005465	milking speed
ARS-BFGL-NGS-18999	rs109422338	6:102771937	4.98988	1.40·10-2	ENSBTAG00000020598
BTA-103976-NO-RS	rs42326910	6:103186091	5.4665	1.06·10-3	ENSBTAG00000053771
ARS-BFGL-NGS-40736	rs109188808	6:104310525	6.20369	1.27·10-5	-
HAPMAP47733-BTA-77738	rs41655065	6:104350026	7.53771	1.10·10-9	-
ARS-BFGL-NGS-10480	rs110812344	6:104379509	7.415	2.81·10-9	-
BTA-84256-NO-RS	rs41663465	9:73175040	4.96173	1.61·10-2	-
UA-IFASA-8401	rs41584906	19:7250802	10.1245	2.15·10-24	ENSBTAG00000021292
HAPMAP40983-BTA-44816	rs41641989	19:7300658	8.67589	2.05·10-18	ENSBTAG00000038823
ARS-BFGL-NGS-10718	rs110015884	19:7333959	12.1705	2.23·10-34	-
ARS-BFGL-NGS-14867	rs110036994	19:7717717	6.43687	2.81·10-6	ENSBTAG00000009948
ARS-BFGL-NGS-101648	rs109071857	19:9944425	4.87927	2.46·10-2	ENSBTAG00000021677
UA-IFASA-6593	rs41600341	19:10691042	4.89206	2.31·10-2	ENSBTAG00000011623
HAPMAP60068-RS29019325	rs29019325	19:19814327	5.33119	2.25·10-3	ENSBTAG00000008109
HAPMAP60068-RS29019325	rs29019325	19:19814327	5.3312	2.25·10-3	ENSBTAG00000008110
UA-IFASA-8477	rs29020026	19:59364966	6.13946	1.91·10-7	-	Teat placement - front, Teat placement - rare, Udder attachment, Udder cleft, Udder depth, Udder height
UA-IFASA-6126	rs41653204	19:59437500	6.74614	3.50·10-7	-
HAPMAP32800-BTA-133450	rs109682344	19:59547890	5.73162	2.30·10-4	ENSBTAG00000048685
BTB-00252636	rs43461171	20:6586964	5.1401	6.35·10-3	-
HAPMAP47366-BTA-66045	rs41586565	29:45629483	5.42325	1.35·10-3	ENSBTAG00000010304
HAPMAP42902-BTA-30352	rs41626488	X:86996906	5.4712	1.03·10-3	-
